# Supplementary material for: Structural Analysis of the 42 kDa Parvulin of Trypanosoma brucei
Source: MDPI journal article supplement (doi:10.3390/biom9030093), 2019-03-07
Supplement: s1 [file s1]

## **Structural Analysis of the 42 kDa Parvulin of *Trypanosoma brucei***

Edisa Rehic<sup>1</sup>, Dana Hoenig<sup>1</sup>, Bianca E. Kamba<sup>1</sup>, Anna Goehring<sup>1</sup>, Eckhard Hofmann<sup>2</sup>, Raphael Gasper<sup>2,3</sup>, Anja Matena<sup>1</sup> and Peter Bayer<sup>1</sup>

<sup>1</sup>University Duisburg-Essen, Research Group Structural and Medicinal Biochemistry, Centre for Medical Biotechnology (ZMB), University of Duisburg-Essen, 45117 Essen, Germany

<sup>2</sup>Protein Crystallography, Faculty of Biology and Biotechnology, Ruhr University Bochum, 44801 Bochum, Germany

<sup>3</sup>Max-Planck-Institute for Molecular Physiology, 44227 Dortmund, Germany

## **Supporting Information**

**Table S1.** Structural statistics for the deposited ensemble of 10 lowest energy PPIase structures (PDB-ID:2N87).

|                                                                                 |                             |
|---------------------------------------------------------------------------------|-----------------------------|
| NOE distance constraints                                                        | 3023                        |
| Intraresidual und sequential $ i-j  \leq 1$                                     | 1910                        |
| Medium range, $1 <  i-j  < 5$                                                   | 408                         |
| Long range $ i-j  \geq 5$                                                       | 705                         |
| Torsion angle constraints                                                       | 206                         |
| $\Phi$ -angle                                                                   | 103                         |
| $\Psi$ -angle                                                                   | 103                         |
| Hydrogen bonds                                                                  | 46                          |
| Ramachandran plot (PPIase264-383)                                               |                             |
| Residues in most favored regions (%)                                            | 78.8                        |
| Residues in allowed regions (%)                                                 | 21.2                        |
| Residues in disallowed regions (%)                                              | 0                           |
| <i>Root mean square deviation</i> (RMSD [ $\text{\AA}$ ]) to the mean structure |                             |
| Backbone atoms                                                                  | $0.41 \pm 0.08 \text{ \AA}$ |
| Heavy atoms                                                                     | $0.93 \pm 0.05 \text{ \AA}$ |

**Table S2.** Structural statistics for the deposited PPIase structure (PDB-ID: 6GMP) solved by X-ray analysis. (Numbers in parenthesis represent highest resolution shell)

|                                                  |                                         |
|--------------------------------------------------|-----------------------------------------|
| Beam line                                        | PETRA III, PX13, DESY, Hamburg, Germany |
| Cell Parameters [Å]                              | 28.6 69.9 102.9, 90° 90° 90°            |
| Space group                                      | C2221                                   |
| Wavelength [Å]                                   | 0.971                                   |
| Resolution [Å]                                   | 18.46 – 1.35 (1.41-1.35)                |
| No. of reflections                               | 121870 (2064)                           |
| Unique reflections                               | 23777 (1076)                            |
| Redundancy                                       | 5.1                                     |
| Redundancy value for highest shell               | 2.4 (at 1.35 Å)                         |
| I / $\sigma$                                     | 36.77 (1.19)                            |
| I/ $\sigma$ I                                    | 1.19 at 1.35 Å                          |
| CC1/2 [%]                                        | 100 (48.6)                              |
| Rmeas [%]                                        | 2.3 (83.7)                              |
| Wilson B-Factor [Å <sup>2</sup> ]                | 22.18                                   |
| Refinement                                       |                                         |
| Rwork / Rfree [%]                                | 14.6 / 18.1                             |
| r.m.s.d. bond length [Å]                         | 0.006                                   |
| r.m.s.d. angles [°]                              | 1.135                                   |
| Ramachandran favoured<br>(allowed, outliers) [%] | 98.4 (1.6, 0)                           |
| Mean B-Factor [Å <sup>2</sup> ]                  | 32.45                                   |
| No. of atoms (with H)                            |                                         |
| Total                                            | 2107                                    |
| Water                                            | 135                                     |

**Table S3.** Structural statistics for the deposited ensemble of 10 lowest energy NterFHA structures (PDB-ID: 2N84)

|                                                                           |                           |
|---------------------------------------------------------------------------|---------------------------|
| NOE distance constraints                                                  | 2667                      |
| Intraresidual und sequential $ i-j  \leq 1$                               | 1724                      |
| Medium range, $1 <  i-j  < 5$                                             | 359                       |
| Long range $ i-j  \geq 5$                                                 | 584                       |
| Torsion angle constraints                                                 | 262                       |
| $\Phi$ -angle                                                             | 131                       |
| $\Psi$ -angle                                                             | 1031                      |
| Hydrogen bonds                                                            | 42                        |
| Ramachandran plot (PPIase264-383)                                         |                           |
| Residues in most favored regions (%)                                      | 80.1                      |
| Residues in additional allowed regions (%)                                | 19.9                      |
| Residues in generously allowed regions (%)                                | 0.1                       |
| Residues in disallowed regions (%)                                        | 0                         |
| <i>Root mean square deviation (RMSD [Å]) to the mean structure 1-177</i>  |                           |
| Backbone atoms                                                            | $12.5 \pm 4.2 \text{ Å}$  |
| Heavy atoms                                                               | $12.8 \pm 4.5 \text{ Å}$  |
| <i>Root mean square deviation (RMSD [Å]) to the mean structure 33-177</i> |                           |
| Backbone atoms                                                            | $1.62 \pm 0.52 \text{ Å}$ |
| Heavy atoms                                                               | $1.89 \pm 0.51 \text{ Å}$ |
| <i>Root mean square deviation (RMSD [Å]) to the mean structure 48-177</i> |                           |
| Backbone atoms                                                            | $0.80 \pm 0.15 \text{ Å}$ |
| Heavy atoms                                                               | $1.02 \pm 0.12 \text{ Å}$ |
| <i>Root mean square deviation (RMSD [Å]) to the mean structure 58-173</i> |                           |
| Backbone atoms                                                            | $0.33 \pm 0.07 \text{ Å}$ |
| Heavy atoms                                                               | $0.74 \pm 0.06 \text{ Å}$ |

**Table S4.** Mean  $K_D$  values calculated from  $^1\text{H}$ - $^{15}\text{N}$ -HSQC experiments after adding unlabeled Ala-Glu-Ala-pThr-Ala-Glu-Xaa-peptides (up to 8 mM) or Suc-Ala-pThr-Pro-Ala-NH<sub>2</sub> (up to 13 mM) stepwise to a *TbPar42* NterFHA solution (250  $\mu\text{M}$ ).

|                              | <b>Ala-Glu-Ala-pThr-Ala-Glu-Xaa</b> |            |            |            |            | <b>Suc-Ala-pThr-Pro-Ala-NH<sub>2</sub></b> |
|------------------------------|-------------------------------------|------------|------------|------------|------------|--------------------------------------------|
| <b>Xaa</b>                   | <b>Ser</b>                          | <b>Asp</b> | <b>Val</b> | <b>Ile</b> | <b>Glu</b> |                                            |
| <b><math>K_D</math> [mM]</b> | 3.1                                 | 3.4        | 3.9        | 4.1        | 5.4        | 5.4                                        |

**Table S5.** Oligonucleotides used as forward and reverse primers for PCR-amplification of the constructs *TbPar42*-full length (1-383), N-terminal extended FHA domain (NterFHA) (1-177), linker region (172-266) and PPIase domain (264-383) from the synthesized *TbPar42* DNA as a template.

| constructs              | oligonucleotides                                                                     |
|-------------------------|--------------------------------------------------------------------------------------|
| <i>TbPar42</i> -FL      | CACACA GGGCCC ATGGTGACAAGC<br>GGTTGG CTCGAG CTTA TTCCACGCGA                          |
| <i>TbPar42</i> -NterFHA | CACACA GGGCCC ATGGTGACAAGC<br>GGTTGG CTCGAG CTTA AG AAG AAG ACG GTG GCC CC           |
| <i>TbPar42</i> -Linker  | CACACA GGGCCC GGG CCA CCG TCT TCT TCT AA<br>GGTTGG CTCGAG CTTA TTC GGT CGG CGG CGG C |
| <i>TbPar42</i> -PPIase  | GGTTGG CTCGAG CTTA TTCCACGCGA<br>CACACA GGGCCC CCG ACC GAA CGC CAT TTT TAT           |



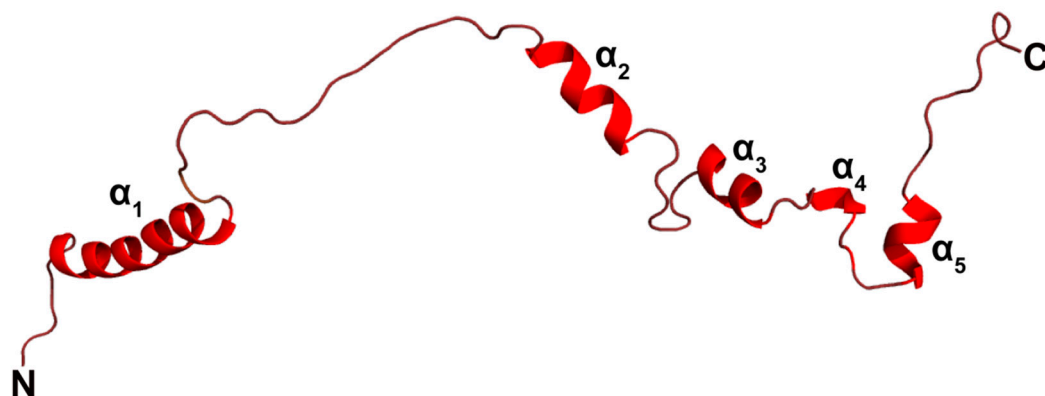

**Figure S2.** CS Rosetta model of the *TbPar42* linker region (Arg179-Glu266) calculated on the server of the BMRB data bank (<https://csrosetta.bmrwisc.edu/>). A representative structure (number 10 from the top ten ensemble) out of 3000 calculated models is shown. The helices presented in this figure are conserved (minor alterations in length) within all models of the top ten ensemble. Calculation was performed on basis of  $H_N$ ,  $C\alpha$ ,  $C\beta$ ,  $CO$  and  $N$  chemical shifts extracted from NMR spectra. During calculation, flexible regions were not removed within the flexible tail handling procedure, but were disregarded during energy minimization. Owing to the flexibility of the linker region no r.m.s.d values are provided.



|         |     |                                                    |     |
|---------|-----|----------------------------------------------------|-----|
| TbPar42 | 264 | PTERHFYHVLVKHKDVRPSSSLAPRNKGEKITRSRADAINLAQAILAQHK | 313 |
|         |     | ..... :    ...    . :.     ::: : . ....:..         |     |
| hPin1   | 52  | PARVRCSHLLVKHSQSRPSSW---RQEKITRTKEEALELINGYIQKIK   | 97  |
| TbPar42 | 314 | ERKTWSLDFEVQVVRDFSECGSAKRDGDLGMVESGTYTEGFDTVAFLKS  | 363 |
|         |     | ..: : ..... : .    .    ..... ..... :..: : :       |     |
| hPin1   | 98  | SGE----EDFESLASQFSDCSSAKARGDLGAFFSGQMOKPFEDASFALRT | 143 |
| TbPar42 | 364 | GEVSAPVETELGVHLYRVE                                | 383 |
|         |     | : .  .  :.: : . .                                  |     |
| hPin1   | 144 | GEMSGPVFTDSGIHILRTE                                | 163 |

**Figure S3.** Sequence alignment of the PPIase domains of *TbPar42* (blue) and *hPin1* (grey). The pairwise sequence alignment was produced using the selected EMBOSS tool Needle ([https://www.ebi.ac.uk/Tools/psa/emboss\\_needle/](https://www.ebi.ac.uk/Tools/psa/emboss_needle/)) [4]. We used the matrix EBLOSUM62, a gap penalty of 10.0 and an extended penalty of 0.5. A sequence identity of 37.5% (bold letters, symbol = lines) and a sequence homology of 56.7% (symbols = dots and colons) with 6.7% of gaps were calculated by the program (Score = 210).

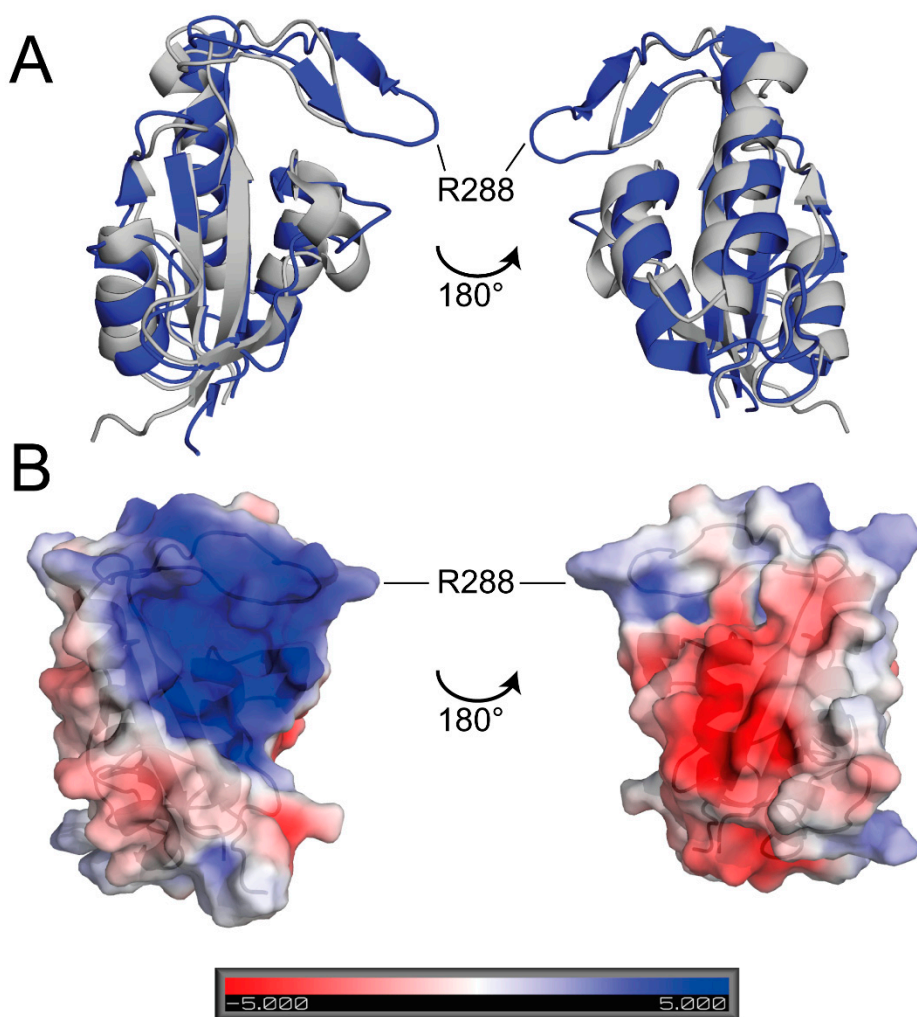

**Figure S4.** NMR structure (PDB-ID: 2N87) of the PPIase domain of *TbPar42*. A, Superposition of the PPIase domains of *TbPar42* (blue) and *hPin1* (grey) (PDB-ID:1NMW). The position of the outmost  $\alpha 1$ - $\beta 2$  loop residue Arg288 is labeled. Structures were superimposed using the PyMOL Molecular Graphics System, Version 1.3. B, Surface electrostatics of *TbPar42* PPIase domain. Electrostatics calculated by APBS (the Adaptive Poisson-Boltzmann Solver) in PyMol. The partial charges and atom radii for the calculation was generated by PDB2PQR Version 2.0.0. The electrostatic surface is color-coded (from -5 k<sub>B</sub>T/e<sub>c</sub> to +5 k<sub>B</sub>T/e<sub>c</sub>)

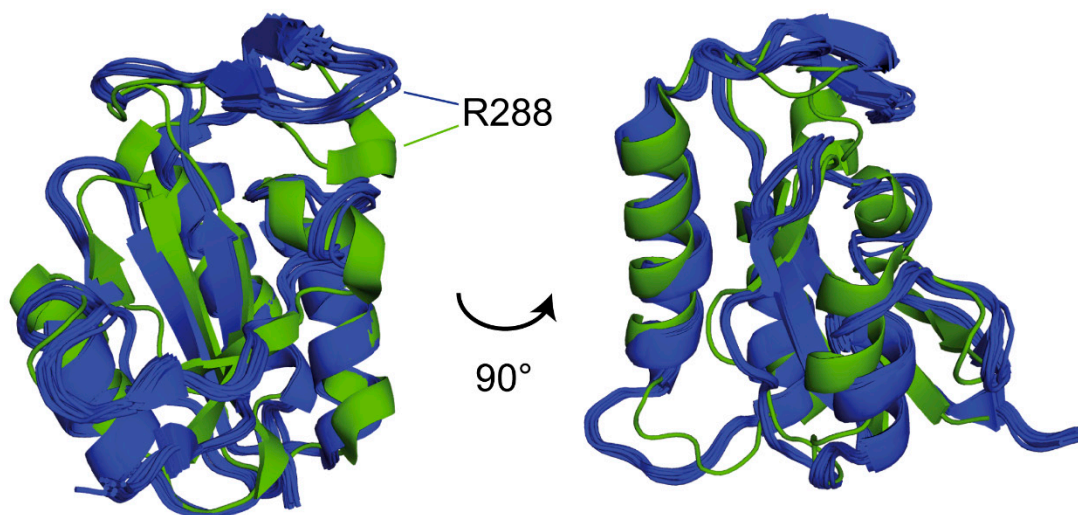

**Figure S5.** Comparison of X-ray structure (PDB-ID: 6GMP) and NMR structure (PDB-ID:2N87) of the PPIase domain of *TbPar42*. The X-ray structure (green) was superimposed with the NMR ensemble (blue) using the program PyMol. The overall C $\alpha$  r.m.s.d. of the alignment is 2.43 Å, the r.m.s.d. over all heavy atoms is 3.75 Å. The position of the outmost  $\alpha$ 1- $\beta$ 2 loop residue Arg288 is labeled.

## References

1. Drozdetskiy, A.; Cole, C.; Procter, J.; Barton, G.J. JPred4: a protein secondary structure prediction server. *Nucleic Acids Research* **2015**, *43*, W389–94, doi:10.1093/nar/gkv332.
2. Garnier, J.; Gibrat, J.-F.; Robson, B. [32] GOR method for predicting protein secondary structure from amino acid sequence. In *Computer methods for macromolecular sequence analysis*; Doolittle, R.F., Ed.; Acad. Press: San Diego, Calif., 1996; pp 540–553, ISBN 9780121821678.
3. Geourjon, C.; Deléage, G. SOPMA: significant improvements in protein secondary structure prediction by consensus prediction from multiple alignments. *Computer applications in the biosciences : CABIOS* **1995**, *11*, 681–684.
4. Rice, P.; Longden, I.; Bleasby, A. EMBOSS: The European Molecular Biology Open Software Suite. *Trends in Genetics* **2000**, *16*, 276–277, doi:10.1016/S0168-9525(00)02024-2.
